# Supplementary material for: Science Applied for the Investigation of Imperial Gate from Eighteenth Century Wooden Church of Nicula Monastery
Source: Hindawi journal article supplement (doi:10.1155/2017/6167856), 2017-01-01
Supplement: f1 [file 6167856.f1.zip]

Archive with 2 entries (2 files):
- Supplementary Material_Nicula_JSPEC_1779941.doc
- Supplementary Material_Nicula_JSPEC_1779942.pdf
