# Supplementary material for: Science Applied for the Investigation of Imperial Gate from Eighteenth Century Wooden Church of Nicula Monastery
Source: Hindawi journal article supplement (doi:10.1155/2017/6167856), 2017-01-01
Supplement: f1 [file 6167856.f1.zip › Supplementary Material_Nicula_JSPEC_1779942.pdf]

Supplementary Material

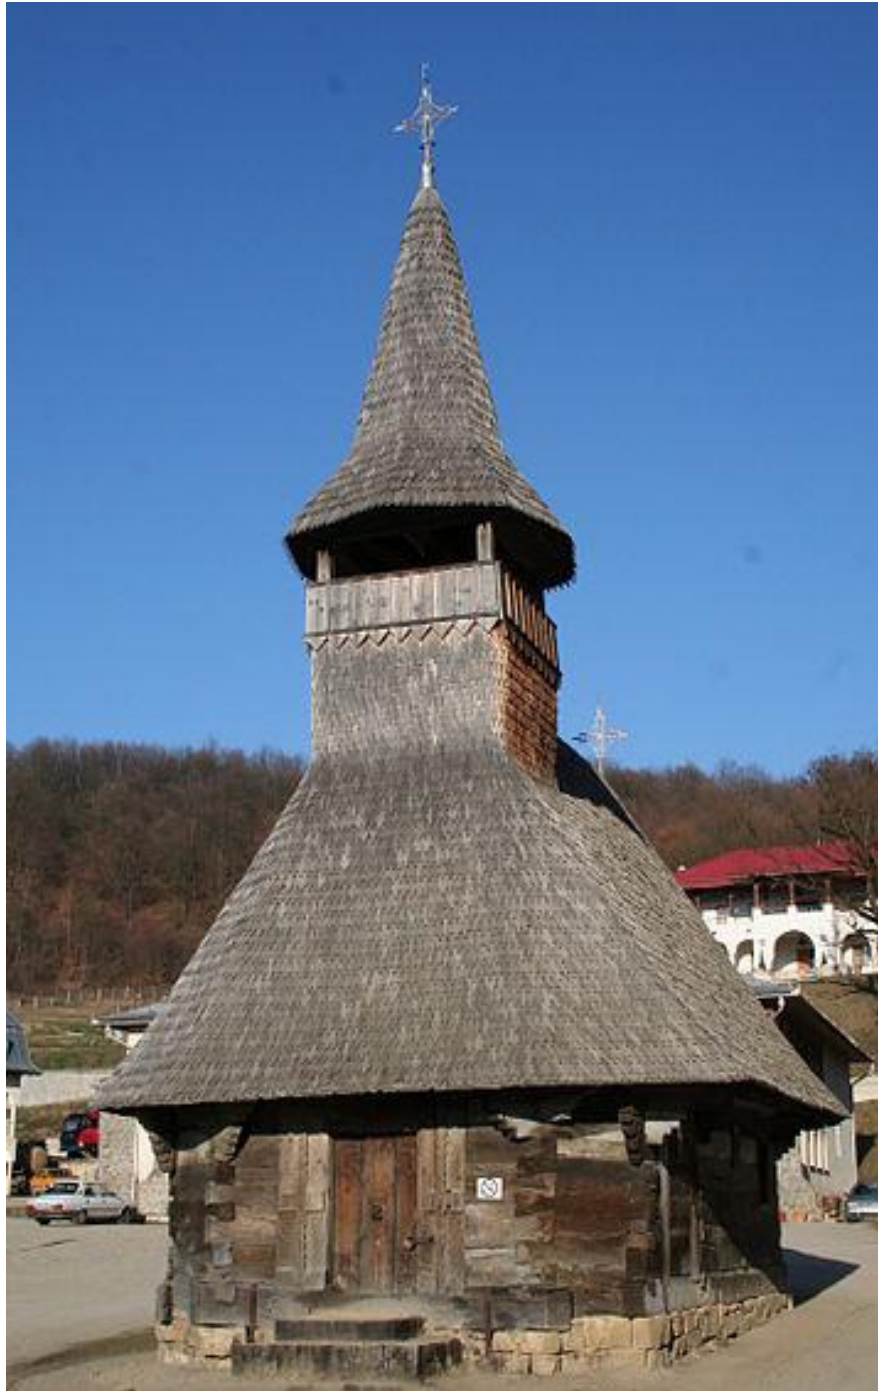

Fig. 1A Nicula wooden church

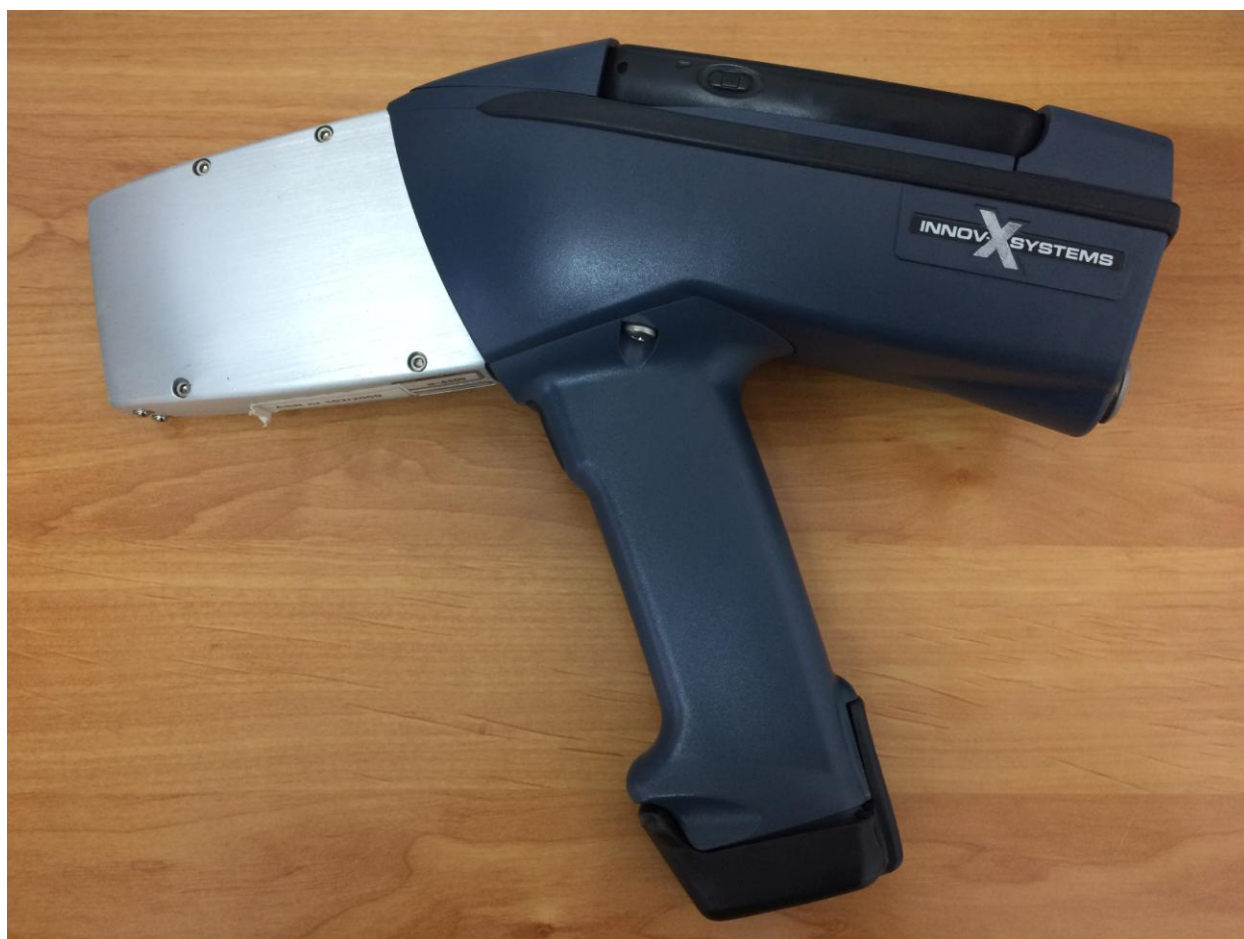

Fig. 2 XRF portable device

Table 1 XRF data analysis

| ppm(mg/kg)                               | Fe   | Cu  | As    | Sn   | Ba   | Hg   | Pb     |
|------------------------------------------|------|-----|-------|------|------|------|--------|
| evangelist –<br>down - red               | 981  | 250 | 7612  | <LOD | 75   | 390  | 35181  |
| evangelist - blue                        | 2193 | 146 | 2272  | <LOD | 3871 | 128  | 9417   |
| evangelist - blue                        | 2594 | 86  | 3198  | <LOD | 4347 | 207  | 13017  |
| blue                                     | 1509 | 89  | 1607  | <LOD | 5061 | 112  | 6526   |
| blue                                     | 882  | 32  | 2335  | <LOD | <LOD | <LOD | 125    |
| evangelist –<br>down – frame -<br>yellow | 794  | 63  | 5105  | <LOD | <LOD | <LOD | 251    |
| blue background                          | 708  | 65  | 3879  | <LOD | <LOD | <LOD | 230    |
| point - red                              | 1125 | 611 | 19342 | <LOD | 142  | 1625 | 119458 |

|                                          |       |       |       |      |      |      |       |
|------------------------------------------|-------|-------|-------|------|------|------|-------|
| green                                    | 455   | 3611  | 40    | <LOD | <LOD | <LOD | 60    |
| frame - brown                            | 13479 | 71    | 124   | <LOD | 74   | <LOD | 89    |
| threshold - frame                        | 643   | 140   | 5194  | <LOD | 49   | 309  | 21724 |
| archangel – robe<br>- white              | 192   | 74    | 2691  | <LOD | 5759 | 180  | 11277 |
| archangels – up -<br>yellow              | 447   | 47    | 6948  | <LOD | <LOD | 109  | 158   |
| frame - green                            | 321   | 98    | 35    | 1579 | <LOD | <LOD | 108   |
| evangelist –<br>middle - green           | 517   | 9283  | 85    | <LOD | 52   | <LOD | 154   |
| leaf - green                             | 798   | 13250 | 104   | <LOD | 84   | <LOD | 272   |
| frame - red                              | 9899  | 37    | 388   | <LOD | 55   | <LOD | 120   |
| leaf - yellow                            | 1304  | 78    | 5673  | <LOD | 118  | <LOD | 281   |
| leaf - yellow                            | 299   | 50    | 1634  | <LOD | 32   | <LOD | 149   |
| archangel –<br>down – frame -<br>yellow  | 422   | 65    | 3514  | <LOD | 108  | <LOD | 199   |
| archangel –<br>down – frame -<br>yellow  | 952   | 129   | 4705  | <LOD | <LOD | <LOD | 156   |
| archangel – robe<br>- red                | 533   | 279   | 8054  | <LOD | 111  | 597  | 39488 |
| evangelist –<br>down - aura              | 168   | 57    | 173   | 2112 | <LOD | <LOD | 161   |
| evangelist –<br>middle - aura            | 1268  | 157   | 1583  | 2007 | 80   | <LOD | 207   |
| halo – up -<br>yellow                    | 324   | 59    | 4790  | <LOD | <LOD | <LOD | 200   |
| grapes - green                           | 1131  | 531   | 60    | 4031 | 65   | <LOD | 539   |
| up                                       | 428   | 75    | 43    | 1768 | <LOD | <LOD | 67    |
| evangelist –<br>middle - blue            | 1717  | 41    | 3713  | <LOD | <LOD | <LOD | 127   |
| evangelist –<br>down – green-<br>blue    | 1242  | 64    | 4363  | <LOD | 498  | 61   | 1450  |
| near the robe of<br>evangelist -<br>down | 5990  | 71    | 374   | <LOD | 134  | <LOD | 1204  |
| down - red                               | 890   | 260   | 11675 | <LOD | 76   | 720  | 59541 |

Legend: LOD-limit of detection; method uncertainty is  $\leq 20\%$

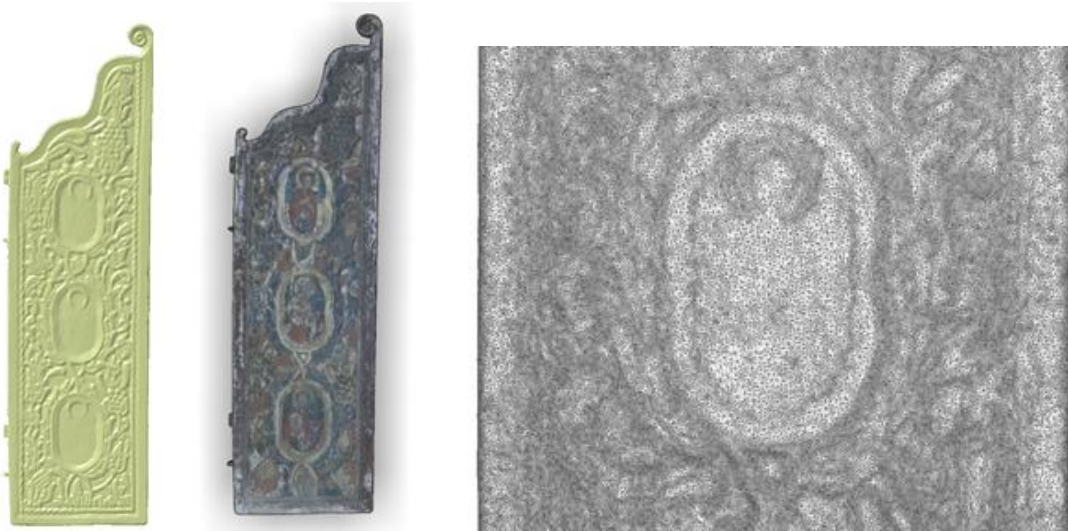

Fig. 9 Digitized 3D model of Imperial Gates: left – model obtained with laser scanner; center – model obtained with photogrammetry; right – triangle mesh of the scanned model.

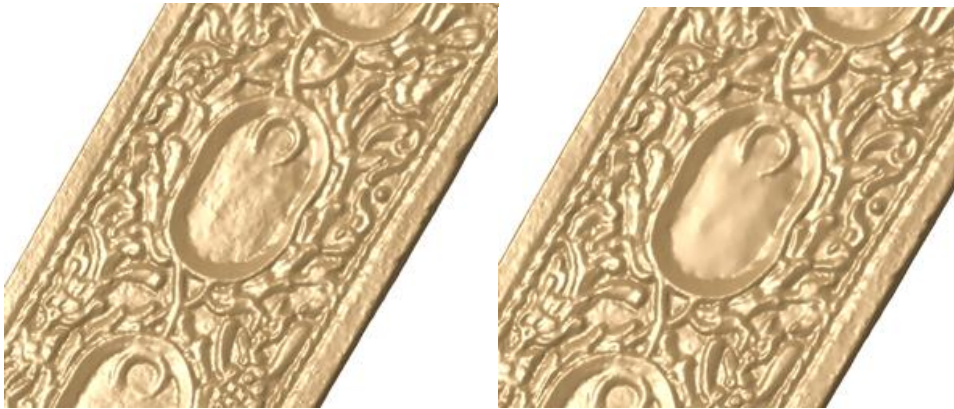

Fig. 10 Editing the wooden support mesh of the Imperial Gates
